# Supplementary material for: Effects of New Mutations in BMPRIB, GDF9, BMP15, LEPR, and B4GALNT2 Genes on Litter Size in Sheep
Source: MDPI journal article supplement (doi:10.3390/vetsci10040258), 2023-03-28
Supplement: s1 [file s1]

**Table S1.** Genotypic, allelic frequencies and diversity parameters of two mutations of *BMP1B* in eight sheep populations.

| Locus/Breed          | Genotype frequency |       |       | Allele frequency |       | Diversity parameter |       |                |       |                      |
|----------------------|--------------------|-------|-------|------------------|-------|---------------------|-------|----------------|-------|----------------------|
|                      |                    |       |       |                  |       | Ho                  | He    | n <sub>e</sub> | PIC   | χ <sup>2</sup> (HWE) |
| c.746A>G (Gln249Arg) | GG                 | AG    | AA    | G                | A     |                     |       |                |       |                      |
| UM                   | 0.985              | 0.015 | 0.000 | 0.992            | 0.008 | 0.985               | 0.015 | 1.016          | 0.016 | 0.020                |
| DBU                  | 0.987              | 0.013 | 0.000 | 0.993            | 0.007 | 0.987               | 0.013 | 1.013          | 0.014 | 0.013                |
| SFKU                 | 1.000              | 0.000 | 0.000 | 1.000            | 0.000 | 1.000               | 0.000 | 1.000          | 0.000 | -                    |
| SN                   | 1.000              | 0.000 | 0.000 | 1.000            | 0.000 | 1.000               | 0.000 | 1.000          | 0.000 | -                    |
| MG                   | 0.962              | 0.038 | 0.000 | 0.981            | 0.019 | 0.962               | 0.038 | 1.039          | 0.037 | 0.100                |
| Tan                  | 0.767              | 0.200 | 0.033 | 0.867            | 0.133 | 0.769               | 0.231 | 1.301          | 0.204 | 0.544                |
| Hu                   | 0.167              | 0.333 | 0.500 | 0.333            | 0.667 | 0.556               | 0.444 | 1.800          | 0.346 | 1.875                |
| STH                  | 0.000              | 0.667 | 0.333 | 0.333            | 0.667 | 0.556               | 0.444 | 1.800          | 0.346 | 7.500                |
| c.1470G>T (490Thr)   | AA                 | AC    | CC    | A                | C     |                     |       |                |       |                      |
| UM                   | 0.166              | 0.477 | 0.357 | 0.405            | 0.595 | 0.518               | 0.482 | 1.930          | 0.366 | 0.033                |
| DBU                  | 0.039              | 0.365 | 0.595 | 0.222            | 0.778 | 0.655               | 0.345 | 1.528          | 0.286 | 0.984                |
| SFKU                 | 0.212              | 0.606 | 0.182 | 0.515            | 0.485 | 0.500               | 0.500 | 1.998          | 0.375 | 3.001                |
| SNT                  | 0.147              | 0.505 | 0.348 | 0.399            | 0.601 | 0.520               | 0.480 | 1.922          | 0.365 | 0.526                |
| MG                   | 0.160              | 0.412 | 0.428 | 0.366            | 0.634 | 0.536               | 0.464 | 1.866          | 0.356 | 3.149                |
| Tan                  | 0.233              | 0.533 | 0.233 | 0.500            | 0.500 | 0.500               | 0.500 | 2.000          | 0.375 | 0.133                |
| Hu                   | 0.000              | 0.033 | 0.967 | 0.017            | 0.983 | 0.967               | 0.033 | 1.034          | 0.033 | 0.009                |
| STH                  | 0.000              | 0.333 | 0.667 | 0.167            | 0.833 | 0.722               | 0.278 | 1.385          | 0.240 | 1.200                |

\*UM: Ujimqin; DPU: Dorper × Ujimqin; SFKU: Suffolk × Ujimqin; SN: Sonid; MG: Mongolia; STH: Small-tailed Han; *H<sub>o</sub>*: observed heterozygosity; *H<sub>e</sub>*: expected heterozygosity; *n<sub>e</sub>*: effective allele numbers; *PIC*: polymorphism information content; *HWE*: Hardy-Weinberg equilibrium; <sup>1</sup>The classification was conducted according to the *PIC* values (*PIC* value < 0.25, low polymorphism; 0.25 < *PIC* value < 0.5, moderate polymorphism; and *PIC* value > 0.5, high polymorphism); <sup>2</sup>No Hardy-Weinberg departure was detected from the obtained genotype frequencies.
