# Supplementary material for: Effects of New Mutations in BMPRIB, GDF9, BMP15, LEPR, and B4GALNT2 Genes on Litter Size in Sheep
Source: MDPI journal article supplement (doi:10.3390/vetsci10040258), 2023-03-28
Supplement: s1 [file s1]

**Table S3.** Genotypic, allelic frequencies and diversity parameters of three mutations of *BMP15* in eight sheep populations.

| Locus/Breed                       | Genotype frequency |         |       | Allele frequency |       | Diversity parameter |       |                |       |                      |
|-----------------------------------|--------------------|---------|-------|------------------|-------|---------------------|-------|----------------|-------|----------------------|
|                                   |                    |         |       |                  |       | Ho                  | He    | n <sub>e</sub> | PIC   | χ <sup>2</sup> (HWE) |
| g.509807863G>A                    | GG                 | GA      | AA    | G                | A     |                     |       |                |       |                      |
| UM                                | 0.883              | 0.117   | 0.000 | 0.942            | 0.058 | 0.890               | 0.110 | 1.124          | 0.103 | 1.253                |
| DBU                               | 0.977              | 0.023   | 0.000 | 0.988            | 0.012 | 0.977               | 0.023 | 1.023          | 0.023 | 0.041                |
| SFKU                              | 0.985              | 0.015   | 0.000 | 0.992            | 0.008 | 0.985               | 0.015 | 1.015          | 0.016 | 0.004                |
| SN                                | 0.995              | 0.005   | 0.000 | 0.997            | 0.003 | 0.995               | 0.005 | 1.005          | 0.006 | 0.001                |
| MG                                | 0.984              | 0.016   | 0.000 | 0.992            | 0.008 | 0.984               | 0.016 | 1.016          | 0.016 | 0.016                |
| Tan                               | 1.000              | 0.000   | 0.000 | 1.000            | 0.000 | 1.000               | 0.000 | 1.000          | 0.000 | -                    |
| Hu                                | 1.000              | 0.000   | 0.000 | 1.000            | 0.000 | 1.000               | 0.000 | 1.000          | 0.000 | -                    |
| STH                               | 1.000              | 0.000   | 0.000 | 1.000            | 0.000 | 1.000               | 0.000 | 1.000          | 0.000 | -                    |
| c.31_33CTTinsdel (11Leu deletion) | CTT                | CTT.DEL | DEL   | CTT              | DEL   |                     |       |                |       |                      |
| UM                                | 0.588              | 0.345   | 0.068 | 0.760            | 0.240 | 0.635               | 0.365 | 1.574          | 0.298 | 0.995                |
| DBU                               | 0.276              | 0.549   | 0.174 | 0.551            | 0.449 | 0.505               | 0.495 | 1.979          | 0.372 | 3.694                |
| SFKU                              | 0.667              | 0.303   | 0.030 | 0.818            | 0.182 | 0.702               | 0.298 | 1.424          | 0.253 | 0.023                |
| SN                                | 0.516              | 0.397   | 0.087 | 0.715            | 0.285 | 0.592               | 0.408 | 1.689          | 0.325 | 0.136                |
| MG                                | 0.628              | 0.348   | 0.024 | 0.802            | 0.198 | 0.682               | 0.318 | 1.465          | 0.267 | 2.292                |
| Tan                               | 0.567              | 0.367   | 0.067 | 0.750            | 0.250 | 0.625               | 0.375 | 1.600          | 0.305 | 0.015                |
| Hu                                | 0.633              | 0.300   | 0.067 | 0.783            | 0.217 | 0.661               | 0.339 | 1.514          | 0.282 | 0.405                |
| STH                               | 0.467              | 0.433   | 0.100 | 0.683            | 0.317 | 0.567               | 0.433 | 1.763          | 0.339 | 0.000                |
| c.755T>C (Lue252Pro)              | TT                 | TC      | CC    | T                | C     |                     |       |                |       |                      |
| UM                                | 0.797              | 0.197   | 0.006 | 0.895            | 0.105 | 0.813               | 0.187 | 1.231          | 0.170 | 0.850                |
| DBU                               | 0.773              | 0.217   | 0.010 | 0.882            | 0.118 | 0.791               | 0.209 | 1.264          | 0.186 | 0.482                |
| SFKU                              | 0.879              | 0.121   | 0.000 | 0.939            | 0.061 | 0.886               | 0.114 | 1.128          | 0.108 | 0.275                |
| SN                                | 0.821              | 0.143   | 0.036 | 0.893            | 0.107 | 0.809               | 0.191 | 1.237          | 0.173 | 10.782               |

|     |       |       |       |       |       |       |       |       |       |         |
|-----|-------|-------|-------|-------|-------|-------|-------|-------|-------|---------|
| MG  | 0.848 | 0.144 | 0.008 | 0.920 | 0.080 | 0.853 | 0.147 | 1.173 | 0.136 | 250.000 |
| Tan | 0.964 | 0.036 | 0.000 | 0.982 | 0.018 | 0.965 | 0.035 | 1.036 | 0.035 | 0.009   |
| Hu  | 0.700 | 0.300 | 0.000 | 0.850 | 0.150 | 0.745 | 0.255 | 1.342 | 0.222 | 0.934   |
| STH | 0.621 | 0.379 | 0.000 | 0.810 | 0.190 | 0.693 | 0.307 | 1.444 | 0.260 | 1.589   |

\*UM: Ujimqin; DPU: Dorper × Ujimqin; SFKU: Suffolk × Ujimqin; SN: Sonid; MG: Mongolia; STH: Small-tailed Han;  $H_o$ : observed heterozygosity;  $H_e$ : expected heterozygosity;  $n_e$ : effective allele numbers;  $PIC$ : polymorphism information content;  $HWE$ : Hardy-Weinberg equilibrium; <sup>1</sup>The classification was conducted according to the  $PIC$  values ( $PIC$  value < 0.25, low polymorphism; 0.25 <  $PIC$  value < 0.5, moderate polymorphism; and  $PIC$  value > 0.5, high polymorphism); <sup>2</sup>No Hardy-Weinberg departure was detected from the obtained genotype frequencies.
