# Supplementary material for: Effects of New Mutations in BMPRIB, GDF9, BMP15, LEPR, and B4GALNT2 Genes on Litter Size in Sheep
Source: MDPI journal article supplement (doi:10.3390/vetsci10040258), 2023-03-28
Supplement: s1 [file s1]

**Table S9.** Statistical significance for differences in the allele frequency of LEPR variant among eight sheep populations.

| Variant/Breed       | DPU  | SFKU | SN   | MG   | Tan  | Hu   | STH  |
|---------------------|------|------|------|------|------|------|------|
| c.185G>A (Arg62His) |      |      |      |      |      |      |      |
| UM                  | n.s. | ***  | *    | ***  | n.s. | n.s. | n.s. |
| DPU                 |      | ***  | ***  | ***  | n.s. | *    | n.s. |
| SFKU                |      |      | *    | ***  | **   | n.s. | *    |
| SN                  |      |      |      | ***  | n.s. | n.s. | n.s. |
| MG                  |      |      |      |      | *    | ***  | ***  |
| Tan                 |      |      |      |      |      | n.s. | n.s. |
| Hu                  |      |      |      |      |      |      | n.s. |
| c.240C>T (80Asn)    |      |      |      |      |      |      |      |
| UM                  | ***  | n.s. | *    | n.s. | n.s. | n.s. | n.s. |
| DPU                 |      | *    | ***  | ***  | ***  | ***  | ***  |
| SFKU                |      |      | n.s. | n.s. | **   | n.s. | *    |
| SN                  |      |      |      | n.s. | **   | n.s. | *    |
| MG                  |      |      |      |      | **   | n.s. | *    |
| Tan                 |      |      |      |      |      | n.s. | n.s. |
| Hu                  |      |      |      |      |      |      | n.s. |
| c.279C>T (93Ser)    |      |      |      |      |      |      |      |
| UM                  | ***  | n.s. | *    | n.s. | n.s. | n.s. | n.s. |
| DPU                 |      | *    | ***  | ***  | ***  | ***  | ***  |
| SFKU                |      |      | n.s. | n.s. | **   | n.s. | *    |
| SN                  |      |      |      | n.s. | **   | n.s. | *    |
| MG                  |      |      |      |      | **   | n.s. | *    |
| Tan                 |      |      |      |      |      | n.s. | n.s. |
| Hu                  |      |      |      |      |      |      | n.s. |

\*UM: Ujimqin; DPU: Dorper × Ujimqin; SFKU: Suffolk × Ujimqin; SN: Sonid; MG: Mongolia; STH: Small-tailed Han; n.s.: Non-significant; \*:  $p < 0.05$ ; \*\*:  $p < 0.01$ .
