# Supplementary material for: Effects of New Mutations in BMPRIB, GDF9, BMP15, LEPR, and B4GALNT2 Genes on Litter Size in Sheep
Source: MDPI journal article supplement (doi:10.3390/vetsci10040258), 2023-03-28
Supplement: s1 [file s1]

|      |     |     |      |      |      |      |      |
|------|-----|-----|------|------|------|------|------|
| UM   | *** | *** | n.s. | n.s. | **   | n.s. | n.s. |
| DPU  |     | *   | **   | ***  | n.s. | **   | n.s. |
| SFKU |     |     | ***  | ***  | n.s. | ***  | n.s. |
| SN   |     |     |      | n.s. | **   | n.s. | n.s. |
| MG   |     |     |      |      | **   | n.s. | n.s. |
| Tan  |     |     |      |      |      | **   | n.s. |
| Hu   |     |     |      |      |      |      | n.s. |

---

\*UM: Ujimqin; DPU: Dorper × Ujimqin; SFKU: Suffolk × Ujimqin; SN: Sonid; MG: Mongolia; STH: Small-tailed Han; n.s.: Non-significant; \*:  $p < 0.05$ ; \*\*:  $p < 0.01$ .
