# Supplementary material for: Effects of New Mutations in BMPRIB, GDF9, BMP15, LEPR, and B4GALNT2 Genes on Litter Size in Sheep
Source: MDPI journal article supplement (doi:10.3390/vetsci10040258), 2023-03-28
Supplement: s1 [file s1]

**Table S6.** Statistical significance for differences in the allele frequency of *BMPRI1B* variant among eight sheep populations.

| Variant/Breed        | DPU  | SFKU | SN   | MG   | Tan  | Hu  | STH  |
|----------------------|------|------|------|------|------|-----|------|
| c.746A>G (Gln249Arg) |      |      |      |      |      |     |      |
| UM                   | n.s. | n.s. | n.s. | n.s. | ***  | *** | ***  |
| DPU                  |      | n.s. | n.s. | n.s. | ***  | *** | ***  |
| SFKU                 |      |      | —    | n.s. | ***  | *** | ***  |
| SN                   |      |      |      | **   | ***  | *** | ***  |
| MG                   |      |      |      |      | ***  | *** | ***  |
| Tan                  |      |      |      |      |      | *** | ***  |
| Hu                   |      |      |      |      |      |     | n.s. |
| c.1470G>T (490Thr)   |      |      |      |      |      |     |      |
| UM                   | ***  | *    | n.s. | n.s. | n.s. | *** | ***  |
| DPU                  |      | ***  | ***  | ***  | ***  | *** | n.s. |
| SFKU                 |      |      | *    | **   | n.s. | *** | *    |
| SN                   |      |      |      | n.s. | n.s. | *** | ***  |
| MG                   |      |      |      |      | *    | *** | **   |
| Tan                  |      |      |      |      |      | *** | ***  |
| Hu                   |      |      |      |      |      |     | **   |

\*UM: Ujimqin; DPU: Dorper × Ujimqin; SFKU: Suffolk × Ujimqin; SN: Sonid; MG: Mongolia; STH: Small-tailed Han; n.s.: Non-significant; \*:  $p < 0.05$ ; \*\*:  $p < 0.01$ .
