# Supplementary material for: Effects of New Mutations in BMPRIB, GDF9, BMP15, LEPR, and B4GALNT2 Genes on Litter Size in Sheep
Source: MDPI journal article supplement (doi:10.3390/vetsci10040258), 2023-03-28
Supplement: s1 [file s1]

**Table S5.** Genotypic, allelic frequencies and diversity parameters of six mutations of *B4GALNT2* in eight sheep populations.

| Locus/Breed           | Genotype frequency |       |       | Allele frequency |       | Diversity parameter |       |                |       |                |
|-----------------------|--------------------|-------|-------|------------------|-------|---------------------|-------|----------------|-------|----------------|
|                       |                    |       |       |                  |       | Ho                  | He    | n <sub>e</sub> | PIC   | $\chi^2$ (HWE) |
| c.440 C>T (Pro160Leu) | CC                 | CT    | TT    | C                | T     |                     |       |                |       |                |
| UM                    | 0.785              | 0.203 | 0.012 | 0.886            | 0.114 | 0.798               | 0.202 | 1.253          | 0.182 | 0.014          |
| DBU                   | 0.826              | 0.171 | 0.003 | 0.911            | 0.089 | 0.838               | 0.162 | 1.193          | 0.149 | 0.982          |
| SFKU                  | 0.773              | 0.212 | 0.015 | 0.879            | 0.121 | 0.787               | 0.213 | 1.271          | 0.190 | 0.001          |
| SN                    | 0.810              | 0.179 | 0.011 | 0.899            | 0.101 | 0.819               | 0.181 | 1.221          | 0.165 | 0.013          |
| MG                    | 0.760              | 0.212 | 0.028 | 0.866            | 0.134 | 0.768               | 0.232 | 1.302          | 0.205 | 1.873          |
| Tan                   | 0.967              | 0.000 | 0.033 | 0.967            | 0.033 | 0.936               | 0.064 | 1.069          | 0.062 | 30.000         |
| Hu                    | 0.567              | 0.300 | 0.133 | 0.717            | 0.283 | 0.594               | 0.406 | 1.684          | 0.323 | 2.048          |
| STH                   | 0.733              | 0.233 | 0.033 | 0.850            | 0.150 | 0.745               | 0.255 | 1.342          | 0.222 | 0.217          |
| g.25929637G>A         | GG                 | GA    | AA    | G                | A     |                     |       |                |       |                |
| UM                    | 0.889              | 0.108 | 0.003 | 0.943            | 0.057 | 0.893               | 0.107 | 1.120          | 0.102 | 0.003          |
| DBU                   | 0.970              | 0.030 | 0.000 | 0.985            | 0.015 | 0.971               | 0.029 | 1.030          | 0.029 | 0.069          |
| SFKU                  | 0.985              | 0.015 | 0.000 | 0.992            | 0.008 | 0.985               | 0.015 | 1.015          | 0.016 | 0.004          |
| SN                    | 0.808              | 0.175 | 0.017 | 0.895            | 0.105 | 0.813               | 0.187 | 1.230          | 0.170 | 0.733          |
| MG                    | 0.828              | 0.156 | 0.016 | 0.906            | 0.094 | 0.830               | 0.170 | 1.205          | 0.156 | 1.769          |
| Tan                   | 0.821              | 0.179 | 0.000 | 0.911            | 0.089 | 0.837               | 0.163 | 1.194          | 0.149 | 0.269          |
| Hu                    | 0.967              | 0.033 | 0.000 | 0.983            | 0.017 | 0.967               | 0.033 | 1.034          | 0.033 | 0.009          |
| STH                   | 0.897              | 0.103 | 0.000 | 0.948            | 0.052 | 0.902               | 0.098 | 1.109          | 0.094 | 0.086          |
| g.25929679T>C         | TT                 | TC    | CC    | T                | C     |                     |       |                |       |                |
| UM                    | 0.705              | 0.286 | 0.009 | 0.848            | 0.152 | 0.742               | 0.258 | 1.348          | 0.225 | 3.803          |
| DBU                   | 0.799              | 0.194 | 0.007 | 0.896            | 0.104 | 0.814               | 0.186 | 1.228          | 0.169 | 0.609          |
| SFKU                  | 0.303              | 0.591 | 0.106 | 0.598            | 0.402 | 0.519               | 0.481 | 1.925          | 0.365 | 3.477          |
| SN                    | 0.692              | 0.217 | 0.091 | 0.801            | 0.199 | 0.681               | 0.319 | 1.469          | 0.268 | 14.714         |

|                      |       |       |       |       |       |       |       |       |       |         |
|----------------------|-------|-------|-------|-------|-------|-------|-------|-------|-------|---------|
| MG                   | 0.640 | 0.324 | 0.036 | 0.802 | 0.198 | 0.682 | 0.318 | 1.465 | 0.267 | 250.000 |
| Tan                  | 0.750 | 0.179 | 0.071 | 0.839 | 0.161 | 0.730 | 0.270 | 1.369 | 0.234 | 3.200   |
| Hu                   | 0.967 | 0.033 | 0.000 | 0.983 | 0.017 | 0.967 | 0.033 | 1.034 | 0.033 | 0.009   |
| STH                  | 0.840 | 0.120 | 0.040 | 0.900 | 0.100 | 0.820 | 0.180 | 1.220 | 0.164 | 2.778   |
| g.25929819A>G        | GG    | GA    | AA    | G     | A     |       |       |       |       |         |
| UM                   | 0.705 | 0.286 | 0.009 | 0.848 | 0.152 | 0.742 | 0.258 | 1.348 | 0.225 | 3.803   |
| DBU                  | 0.799 | 0.194 | 0.007 | 0.896 | 0.104 | 0.814 | 0.186 | 1.228 | 0.169 | 0.609   |
| SFKU                 | 0.303 | 0.591 | 0.106 | 0.598 | 0.402 | 0.519 | 0.481 | 1.925 | 0.365 | 3.477   |
| SN                   | 0.549 | 0.380 | 0.071 | 0.739 | 0.261 | 0.614 | 0.386 | 1.628 | 0.311 | 0.033   |
| MG                   | 0.648 | 0.328 | 0.024 | 0.812 | 0.188 | 0.695 | 0.305 | 1.439 | 0.259 | 1.381   |
| Tan                  | 0.700 | 0.233 | 0.067 | 0.817 | 0.183 | 0.701 | 0.299 | 1.427 | 0.254 | 1.462   |
| Hu                   | 0.967 | 0.033 | 0.000 | 0.983 | 0.017 | 0.967 | 0.033 | 1.034 | 0.033 | 0.009   |
| STH                  | 0.700 | 0.267 | 0.033 | 0.833 | 0.167 | 0.722 | 0.278 | 1.385 | 0.240 | 0.048   |
| g.25929965A>T        | AA    | AT    | TT    | A     | T     |       |       |       |       |         |
| UM                   | 0.889 | 0.102 | 0.009 | 0.940 | 0.060 | 0.887 | 0.113 | 1.127 | 0.106 | 3.239   |
| DBU                  | 0.970 | 0.030 | 0.000 | 0.985 | 0.015 | 0.971 | 0.029 | 1.030 | 0.029 | 0.069   |
| SFKU                 | 0.985 | 0.000 | 0.015 | 0.985 | 0.015 | 0.970 | 0.030 | 1.031 | 0.029 | 66.000  |
| SN                   | 0.777 | 0.158 | 0.065 | 0.856 | 0.144 | 0.753 | 0.247 | 1.327 | 0.216 | 23.948  |
| MG                   | 0.828 | 0.156 | 0.016 | 0.906 | 0.094 | 0.830 | 0.170 | 1.205 | 0.156 | 1.769   |
| Tan                  | 0.767 | 0.167 | 0.067 | 0.850 | 0.150 | 0.745 | 0.255 | 1.342 | 0.222 | 3.600   |
| Hu                   | 0.967 | 0.033 | 0.000 | 0.983 | 0.017 | 0.967 | 0.033 | 1.034 | 0.033 | 0.009   |
| STH                  | 0.867 | 0.100 | 0.033 | 0.917 | 0.083 | 0.847 | 0.153 | 1.180 | 0.141 | 3.580   |
| c.823C>T (Pro288Ser) | CC    | CT    | TT    | C     | T     |       |       |       |       |         |
| UM                   | 0.671 | 0.286 | 0.043 | 0.814 | 0.186 | 0.697 | 0.303 | 1.435 | 0.257 | 1.005   |
| DBU                  | 0.803 | 0.188 | 0.010 | 0.896 | 0.104 | 0.814 | 0.186 | 1.228 | 0.169 | 0.027   |
| SFKU                 | 0.909 | 0.091 | 0.000 | 0.955 | 0.045 | 0.913 | 0.087 | 1.095 | 0.082 | 0.150   |

|     |       |       |       |       |       |       |       |       |       |       |
|-----|-------|-------|-------|-------|-------|-------|-------|-------|-------|-------|
| SN  | 0.703 | 0.258 | 0.038 | 0.832 | 0.168 | 0.721 | 0.279 | 1.387 | 0.240 | 1.007 |
| MG  | 0.656 | 0.292 | 0.052 | 0.802 | 0.198 | 0.682 | 0.318 | 1.465 | 0.267 | 1.623 |
| Tan | 0.933 | 0.067 | 0.000 | 0.967 | 0.033 | 0.936 | 0.064 | 1.069 | 0.062 | 0.036 |
| Hu  | 0.600 | 0.367 | 0.033 | 0.783 | 0.217 | 0.661 | 0.339 | 1.514 | 0.282 | 0.193 |
| STH | 0.828 | 0.138 | 0.034 | 0.897 | 0.103 | 0.815 | 0.185 | 1.228 | 0.168 | 1.907 |

---

\*UM: Ujimqin; DPU: Dorper × Ujimqin; SFKU: Suffolk × Ujimqin; SN: Sonid; MG: Mongolia; STH: Small-tailed Han;  $H_o$ : observed heterozygosity;  $H_e$ : expected heterozygosity;  $n_e$ : effective allele numbers;  $PIC$ : polymorphism information content;  $HWE$ : Hardy-Weinberg equilibrium; <sup>1</sup>The classification was conducted according to the  $PIC$  values ( $PIC$  value < 0.25, low polymorphism; 0.25 <  $PIC$  value < 0.5, moderate polymorphism; and  $PIC$  value > 0.5, high polymorphism); <sup>2</sup>No Hardy-Weinberg departure was detected from the obtained genotype frequencies.
