# Supplementary material for: Effects of New Mutations in BMPRIB, GDF9, BMP15, LEPR, and B4GALNT2 Genes on Litter Size in Sheep
Source: MDPI journal article supplement (doi:10.3390/vetsci10040258), 2023-03-28
Supplement: s1 [file s1]

**Table S4.** Genotypic, allelic frequencies and diversity parameters of three mutations of *LEPR* in eight sheep populations.

| Locus/Breed         | Genotype frequency |       |       | Allele frequency |       | Diversity parameter |       |                |       |                      |
|---------------------|--------------------|-------|-------|------------------|-------|---------------------|-------|----------------|-------|----------------------|
|                     |                    |       |       |                  |       | Ho                  | He    | n <sub>e</sub> | PIC   | χ <sup>2</sup> (HWE) |
| c.185G>A (Arg62His) | GG                 | GA    | AA    | G                | A     |                     |       |                |       |                      |
| UM                  | 0.766              | 0.218 | 0.015 | 0.875            | 0.125 | 0.782               | 0.218 | 1.279          | 0.195 | 0.001                |
| DBU                 | 0.819              | 0.181 | 0.000 | 0.910            | 0.090 | 0.835               | 0.165 | 1.197          | 0.150 | 3.007                |
| SFKU                | 0.530              | 0.379 | 0.091 | 0.720            | 0.280 | 0.597               | 0.403 | 1.676          | 0.322 | 0.247                |
| SN                  | 0.661              | 0.311 | 0.028 | 0.816            | 0.184 | 0.700               | 0.300 | 1.428          | 0.255 | 0.235                |
| MG                  | 0.972              | 0.000 | 0.028 | 0.972            | 0.028 | 0.946               | 0.054 | 1.058          | 0.053 | 250.000              |
| Tan                 | 0.833              | 0.167 | 0.000 | 0.917            | 0.083 | 0.847               | 0.153 | 1.180          | 0.141 | 0.248                |
| Hu                  | 0.667              | 0.300 | 0.033 | 0.817            | 0.183 | 0.701               | 0.299 | 1.427          | 0.254 | 0.000                |
| STH                 | 0.767              | 0.200 | 0.033 | 0.867            | 0.133 | 0.769               | 0.231 | 1.301          | 0.204 | 0.544                |
| c.240C>T (80Asn)    | CC                 | CT    | TT    | C                | T     |                     |       |                |       |                      |
| UM                  | 0.185              | 0.452 | 0.363 | 0.411            | 0.589 | 0.516               | 0.484 | 1.938          | 0.367 | 1.400                |
| DBU                 | 0.053              | 0.398 | 0.549 | 0.252            | 0.748 | 0.623               | 0.377 | 1.604          | 0.306 | 0.980                |
| SFKU                | 0.076              | 0.530 | 0.394 | 0.341            | 0.659 | 0.551               | 0.449 | 1.816          | 0.348 | 2.140                |
| SN                  | 0.120              | 0.495 | 0.386 | 0.367            | 0.633 | 0.535               | 0.465 | 1.868          | 0.357 | 0.769                |
| MG                  | 0.128              | 0.460 | 0.412 | 0.358            | 0.642 | 0.540               | 0.460 | 1.851          | 0.354 | 0.000                |
| Tan                 | 0.267              | 0.567 | 0.167 | 0.550            | 0.450 | 0.505               | 0.495 | 1.980          | 0.372 | 0.629                |
| Hu                  | 0.200              | 0.500 | 0.300 | 0.450            | 0.550 | 0.505               | 0.495 | 1.980          | 0.372 | 0.003                |
| STH                 | 0.300              | 0.400 | 0.300 | 0.500            | 0.500 | 0.500               | 0.500 | 2.000          | 0.375 | 1.200                |
| c.279C>T (93Ser)    | CC                 | CT    | TT    | C                | T     |                     |       |                |       |                      |
| UM                  | 0.185              | 0.452 | 0.363 | 0.411            | 0.589 | 0.516               | 0.484 | 1.938          | 0.367 | 1.400                |
| DBU                 | 0.053              | 0.398 | 0.549 | 0.252            | 0.748 | 0.623               | 0.377 | 1.604          | 0.306 | 0.980                |
| SFKU                | 0.076              | 0.530 | 0.394 | 0.341            | 0.659 | 0.551               | 0.449 | 1.816          | 0.348 | 2.140                |
| SN                  | 0.121              | 0.468 | 0.410 | 0.355            | 0.645 | 0.542               | 0.458 | 1.846          | 0.353 | 0.082                |

|     |       |       |       |       |       |       |       |       |       |       |
|-----|-------|-------|-------|-------|-------|-------|-------|-------|-------|-------|
| MG  | 0.128 | 0.460 | 0.412 | 0.358 | 0.642 | 0.540 | 0.460 | 1.851 | 0.354 | 0.000 |
| Tan | 0.267 | 0.567 | 0.167 | 0.550 | 0.450 | 0.505 | 0.495 | 1.980 | 0.372 | 0.629 |
| Hu  | 0.200 | 0.500 | 0.300 | 0.450 | 0.550 | 0.505 | 0.495 | 1.980 | 0.372 | 0.003 |
| STH | 0.300 | 0.400 | 0.300 | 0.500 | 0.500 | 0.500 | 0.500 | 2.000 | 0.375 | 1.200 |

\*UM: Ujimqin; DPU: Dorper × Ujimqin; SFKU: Suffolk × Ujimqin; SN: Sonid; MG: Mongolia; STH: Small-tailed Han;  $H_o$ : observed heterozygosity;  $H_e$ : expected heterozygosity;  $n_e$ : effective allele numbers;  $PIC$ : polymorphism information content;  $HWE$ : Hardy-Weinberg equilibrium; <sup>1</sup>The classification was conducted according to the  $PIC$  values ( $PIC$  value < 0.25, low polymorphism; 0.25 <  $PIC$  value < 0.5, moderate polymorphism; and  $PIC$  value > 0.5, high polymorphism); <sup>2</sup>No Hardy-Weinberg departure was detected from the obtained genotype frequencies.
