# Supplementary material for: Effects of New Mutations in BMPRIB, GDF9, BMP15, LEPR, and B4GALNT2 Genes on Litter Size in Sheep
Source: MDPI journal article supplement (doi:10.3390/vetsci10040258), 2023-03-28
Supplement: s1 [file s1]

**Table S2.** Genotypic, allelic frequencies and diversity parameters of six mutations of *GDF9* in eight sheep populations.

| Locus/Breed         | Genotype frequency |       |       | Allele frequency |       | Diversity parameter |       |                |       |                      |
|---------------------|--------------------|-------|-------|------------------|-------|---------------------|-------|----------------|-------|----------------------|
|                     |                    |       |       |                  |       | Ho                  | He    | n <sub>e</sub> | PIC   | χ <sup>2</sup> (HWE) |
| g.46547859C>T       | CC                 | CT    | TT    | C                | T     |                     |       |                |       |                      |
| UM                  | 0.751              | 0.243 | 0.006 | 0.872            | 0.128 | 0.777               | 0.223 | 1.287          | 0.198 | 2.699                |
| DBU                 | 0.622              | 0.352 | 0.026 | 0.798            | 0.202 | 0.677               | 0.323 | 1.477          | 0.270 | 2.492                |
| SFKU                | 0.773              | 0.197 | 0.030 | 0.871            | 0.129 | 0.776               | 0.224 | 1.289          | 0.199 | 0.986                |
| SN                  | 0.770              | 0.202 | 0.027 | 0.872            | 0.128 | 0.776               | 0.224 | 1.288          | 0.198 | 1.714                |
| MG                  | 0.816              | 0.176 | 0.008 | 0.904            | 0.096 | 0.826               | 0.174 | 1.210          | 0.159 | 0.049                |
| Tan                 | 0.800              | 0.200 | 0.000 | 0.900            | 0.100 | 0.820               | 0.180 | 1.220          | 0.164 | 0.370                |
| Hu                  | 0.767              | 0.200 | 0.033 | 0.867            | 0.133 | 0.769               | 0.231 | 1.301          | 0.204 | 0.544                |
| STH                 | 0.733              | 0.233 | 0.033 | 0.850            | 0.150 | 0.745               | 0.255 | 1.342          | 0.222 | 0.217                |
| g.46547645T>G       | TT                 | TG    | GG    | T                | G     |                     |       |                |       |                      |
| UM                  | 0.609              | 0.363 | 0.028 | 0.791            | 0.209 | 0.669               | 0.331 | 1.495          | 0.276 | 3.072                |
| DBU                 | 0.586              | 0.372 | 0.043 | 0.771            | 0.229 | 0.647               | 0.353 | 1.545          | 0.291 | 0.883                |
| SFKU                | 0.727              | 0.242 | 0.030 | 0.848            | 0.152 | 0.743               | 0.257 | 1.346          | 0.225 | 0.216                |
| SN                  | 0.685              | 0.272 | 0.043 | 0.821            | 0.179 | 0.706               | 0.294 | 1.417          | 0.251 | 1.087                |
| MG                  | 0.712              | 0.258 | 0.031 | 0.840            | 0.160 | 0.732               | 0.268 | 1.367          | 0.233 | 260.000              |
| Tan                 | 0.700              | 0.300 | 0.000 | 0.850            | 0.150 | 0.745               | 0.255 | 1.342          | 0.222 | 0.934                |
| Hu                  | 0.667              | 0.300 | 0.033 | 0.817            | 0.183 | 0.701               | 0.299 | 1.427          | 0.254 | 0.000                |
| STH                 | 0.633              | 0.333 | 0.033 | 0.800            | 0.200 | 0.680               | 0.320 | 1.471          | 0.269 | 0.052                |
| c.260G>A (Arg87His) | AA                 | AG    | GG    | A                | G     |                     |       |                |       |                      |
| UM                  | 0.898              | 0.098 | 0.003 | 0.948            | 0.052 | 0.901               | 0.099 | 1.110          | 0.094 | 0.015                |
| DBU                 | 0.974              | 0.026 | 0.000 | 0.987            | 0.013 | 0.974               | 0.026 | 1.027          | 0.025 | 0.054                |
| SFKU                | 0.955              | 0.045 | 0.000 | 0.977            | 0.023 | 0.956               | 0.044 | 1.046          | 0.044 | 0.036                |
| SN                  | 0.923              | 0.077 | 0.000 | 0.962            | 0.038 | 0.926               | 0.074 | 1.079          | 0.070 | 0.289                |

|                       |       |       |       |       |       |       |       |       |       |         |
|-----------------------|-------|-------|-------|-------|-------|-------|-------|-------|-------|---------|
| MG                    | 0.892 | 0.104 | 0.004 | 0.944 | 0.056 | 0.859 | 0.105 | 1.118 | 0.100 | 0.051   |
| Tan                   | 0.967 | 0.033 | 0.000 | 0.983 | 0.017 | 0.967 | 0.033 | 1.034 | 0.033 | 0.009   |
| Hu                    | 0.967 | 0.033 | 0.000 | 0.983 | 0.017 | 0.967 | 0.033 | 1.034 | 0.033 | 0.009   |
| STH                   | 0.967 | 0.033 | 0.000 | 0.983 | 0.017 | 0.967 | 0.033 | 1.034 | 0.033 | 0.009   |
| c.994A>G (Val322Ile)  | AA    | AG    | GG    | A     | G     |       |       |       |       |         |
| UM                    | 0.920 | 0.074 | 0.006 | 0.957 | 0.043 | 0.918 | 0.082 | 1.090 | 0.079 | 3.534   |
| DBU                   | 0.908 | 0.092 | 0.000 | 0.954 | 0.046 | 0.912 | 0.088 | 1.096 | 0.084 | 0.708   |
| SFKU                  | 0.697 | 0.303 | 0.000 | 0.848 | 0.152 | 0.743 | 0.257 | 1.346 | 0.225 | 2.105   |
| SN                    | 0.935 | 0.065 | 0.000 | 0.967 | 0.033 | 0.937 | 0.063 | 1.067 | 0.062 | 0.209   |
| MG                    | 0.854 | 0.138 | 0.008 | 0.923 | 0.077 | 0.858 | 0.142 | 1.166 | 0.132 | 0.163   |
| Tan                   | 1.000 | 0.000 | 0.000 | 1.000 | 0.000 | 1.000 | 0.000 | 1.000 | 0.000 | -       |
| Hu                    | 1.000 | 0.000 | 0.000 | 1.000 | 0.000 | 1.000 | 0.000 | 1.000 | 0.000 | -       |
| STH                   | 0.967 | 0.033 | 0.000 | 0.983 | 0.017 | 0.967 | 0.033 | 1.034 | 0.033 | 0.009   |
| c.1040T>C (Phe347Ser) | TT    | TC    | CC    | T     | C     |       |       |       |       |         |
| UM                    | 1.000 | 0.000 | 0.000 | 1.000 | 0.000 | 1.000 | 0.000 | 1.000 | 0.000 | -       |
| DBU                   | 0.997 | 0.003 | 0.000 | 0.998 | 0.002 | 0.997 | 0.003 | 1.003 | 0.004 | 0.001   |
| SFKU                  | 1.000 | 0.000 | 0.000 | 1.000 | 0.000 | 1.000 | 0.000 | 1.000 | 0.000 | -       |
| SN                    | 1.000 | 0.000 | 0.000 | 1.000 | 0.000 | 1.000 | 0.000 | 1.000 | 0.000 | -       |
| MG                    | 0.932 | 0.068 | 0.000 | 0.966 | 0.034 | 0.934 | 0.066 | 1.070 | 0.064 | 250.000 |
| Tan                   | 1.000 | 0.000 | 0.000 | 1.000 | 0.000 | 1.000 | 0.000 | 1.000 | 0.000 | -       |
| Hu                    | 1.000 | 0.000 | 0.000 | 1.000 | 0.000 | 1.000 | 0.000 | 1.000 | 0.000 | -       |
| STH                   | 1.000 | 0.000 | 0.000 | 1.000 | 0.000 | 1.000 | 0.000 | 1.000 | 0.000 | -       |
| g.46544883A>G         | GG    | GA    | AA    | G     | A     |       |       |       |       |         |
| UM                    | 0.751 | 0.243 | 0.006 | 0.872 | 0.128 | 0.777 | 0.223 | 1.287 | 0.198 | 2.699   |
| DBU                   | 0.622 | 0.349 | 0.030 | 0.796 | 0.204 | 0.675 | 0.325 | 1.481 | 0.272 | 1.658   |
| SFKU                  | 0.773 | 0.197 | 0.030 | 0.871 | 0.129 | 0.776 | 0.224 | 1.289 | 0.199 | 0.986   |

|     |       |       |       |       |       |       |       |       |       |       |
|-----|-------|-------|-------|-------|-------|-------|-------|-------|-------|-------|
| SN  | 0.764 | 0.209 | 0.027 | 0.868 | 0.132 | 0.771 | 0.229 | 1.297 | 0.203 | 1.412 |
| MG  | 0.764 | 0.228 | 0.008 | 0.878 | 0.122 | 0.786 | 0.214 | 1.273 | 0.191 | 1.033 |
| Tan | 0.800 | 0.200 | 0.000 | 0.900 | 0.100 | 0.820 | 0.180 | 1.220 | 0.164 | 0.370 |
| Hu  | 0.767 | 0.200 | 0.033 | 0.867 | 0.133 | 0.769 | 0.231 | 1.301 | 0.204 | 0.544 |
| STH | 0.733 | 0.233 | 0.033 | 0.850 | 0.150 | 0.745 | 0.255 | 1.342 | 0.222 | 0.217 |

---

\*UM: Ujimqin; DPU: Dorper × Ujimqin; SFKU: Suffolk × Ujimqin; SN: Sonid; MG: Mongolia; STH: Small-tailed Han;  $H_o$ : observed heterozygosity;  $H_e$ : expected heterozygosity;  $n_e$ : effective allele numbers;  $PIC$ : polymorphism information content;  $HWE$ : Hardy-Weinberg equilibrium; <sup>1</sup>The classification was conducted according to the  $PIC$  values ( $PIC$  value < 0.25, low polymorphism; 0.25 <  $PIC$  value < 0.5, moderate polymorphism; and  $PIC$  value > 0.5, high polymorphism); <sup>2</sup>No Hardy-Weinberg departure was detected from the obtained genotype frequencies.
