# Supplementary material for: Effects of New Mutations in BMPRIB, GDF9, BMP15, LEPR, and B4GALNT2 Genes on Litter Size in Sheep
Source: MDPI journal article supplement (doi:10.3390/vetsci10040258), 2023-03-28
Supplement: s1 [file s1]

**Table S8.** Statistical significance for differences in the allele frequency of *BMP15* variant among eight sheep populations.

| Variant/Breed                     | DPU  | SFKU | SN   | MG   | Tan  | Hu   | STH  |
|-----------------------------------|------|------|------|------|------|------|------|
| g.509807863G>A                    |      |      |      |      |      |      |      |
| UM                                | ***  | *    | ***  | ***  | n.s. | n.s. | n.s. |
| DPU                               |      | n.s. | n.s. | n.s. | n.s. | n.s. | n.s. |
| SFKU                              |      |      | n.s. | n.s. | n.s. | n.s. | n.s. |
| SN                                |      |      |      | n.s. | n.s. | n.s. | n.s. |
| MG                                |      |      |      |      | n.s. | n.s. | n.s. |
| Tan                               |      |      |      |      |      | —    | —    |
| Hu                                |      |      |      |      |      |      | —    |
| c.31-33CTTinsdel (11Leu deletion) |      |      |      |      |      |      |      |
| UM                                | ***  | n.s. | n.s. | n.s. | n.s. | n.s. | n.s. |
| DPU                               |      | ***  | ***  | ***  | **   | ***  | *    |
| SFKU                              |      |      | *    | n.s. | n.s. | n.s. | *    |
| SN                                |      |      |      | **   | n.s. | n.s. | n.s. |
| MG                                |      |      |      |      | n.s. | n.s. | *    |
| Tan                               |      |      |      |      |      | n.s. | n.s. |
| Hu                                |      |      |      |      |      |      | n.s. |
| c.755T>C (Lue252Pro)              |      |      |      |      |      |      |      |
| UM                                | n.s. | n.s. | *    | n.s. | n.s. | n.s. | *    |
| DPU                               |      | n.s. | n.s. | *    | *    | n.s. | *    |
| SFKU                              |      |      | n.s. | n.s. | n.s. | *    | *    |
| SN                                |      |      |      | n.s. | *    | n.s. | n.s. |
| MG                                |      |      |      |      | n.s. | n.s. | **   |
| Tan                               |      |      |      |      |      | *    | **   |
| Hu                                |      |      |      |      |      |      | n.s. |

\*UM: Ujimqin; DPU: Dorper × Ujimqin; SFKU: Suffolk × Ujimqin; SN: Sonid; MG: Mongolia; STH: Small-tailed Han; n.s.: Non-significant; \*:  $p < 0.05$ ; \*\*:  $p < 0.01$ .
